# Supplementary material for: A Markerless Gene Deletion System in Streptococcus suis by Using the Copper-Inducible Vibrio parahaemolyticus YoeB Toxin as a Counterselectable Marker
Source: MDPI journal article supplement (doi:10.3390/microorganisms9051095), 2021-05-19
Supplement: s1 [file s1]

**Table S1.** Primers used in this study.

| Primer                      | Sequence (5'-3') <sup>1</sup>          | Size (bp) | Target gene                                               |
|-----------------------------|----------------------------------------|-----------|-----------------------------------------------------------|
| PcopA-F                     | CGGGATCCTTTGGGGAACCTTTGGAG             | 246       | The promoter of <i>S. suis</i> copA                       |
| PcopA-R                     | TACTCATCAAAGGTTACTCCTTTTCCGACTAC       |           |                                                           |
| yoeB <sub>Vp</sub> -F       | GGAGTAACCTTTGATGAGTAGTAGTCAACGTTTATT   | 427       | The yoeB <sub>Vp</sub> gene of <i>V. parahaemolyticus</i> |
| yoeB <sub>Vp</sub> -R       | CGGAATTCTGTAAAATATAACGCCCAATTAA        |           |                                                           |
| PcopA-R2                    | GGATTCCCATAGGTTACTCCTTTTCCGACTAC       | 246       | Combine with PcopA-F to amplify PcopA                     |
| yoeB <sub>ss</sub> -F       | GGAGTAACCTATGGGAATCCATTTTACAGAC        | 258       | The yoeB <sub>ss</sub> gene of <i>S. suis</i>             |
| yoeB <sub>ss</sub> -R       | CGGAATTCTCACCTATAATGATCCTTTAGCG        |           |                                                           |
| QyoeB <sub>Vp</sub> -F      | CGACGAGACCAAAAACCAGATAAG               | 158       | An internal region of yoeB <sub>Vp</sub>                  |
| QyoeB <sub>Vp</sub> -R      | GATGATGCTTGGGATGACTACCTG               |           |                                                           |
| QpmtA-F                     | CGATGTTGTCCGCAATGTCAC                  | 118       | An internal region of pmtA                                |
| QpmtA-R                     | AACCATCGCTTCTCCTTGTGC                  |           |                                                           |
| Q16S-F                      | TAGTCCACGCCGTAAACGATG                  | 159       | An internal region of 16S rRNA                            |
| Q16S-R                      | TAAACCACATGCTCCACCGC                   |           |                                                           |
| spc-F                       | GTTCTGAATACATGTTATAATAACT              | 1130      | The spectinomycin gene                                    |
| spc-R                       | GTTCCCCAAAGTTTTCTAAAATCTGATTACCAAT     |           |                                                           |
| PcopA-yoeB <sub>Vp</sub> -F | TTTAGAAAACCTTTGGGGAACCTTTGGA           | 673       | yoeB <sub>Vp</sub> and the promoter PcopA                 |
| PcopA-yoeB <sub>Vp</sub> -R | TGTAAAATATAACGCCCAATT                  |           |                                                           |
| pmtA-LA-F                   | TGTGTAGCCCTCATTTATTGG                  | 1166      | Left arm of pmtA                                          |
| pmtA-Fir-LA-R               | TATTCACGAACCTATCAACCTCCCCTCGG          |           |                                                           |
| pmtA-SCIY-F                 | GAGGTTGATAGGTTTCGTGAATACATGTTATAATAACT | 1803      | The SCIY cassette                                         |
| pmtA-SCIY-R                 | ACGACCGCTCTTGTAAAATATAACGCCCAATT       |           |                                                           |
| pmtA-Fir-RA-F               | TATATTTTACAAGAGCGGTCGTGATGATGT         | 1170      | Right arm of pmtA                                         |
| pmtA-RA-R                   | ATAGGTCTTGCTGTGCTTGG                   |           |                                                           |
| pmtA-Sec-LA-R               | CGACCGCTCTCTATCAACCTCCCCTCGG           |           |                                                           |
| pmtA-Sec-RA-F               | AGGTTGATAGAGAGCGGTCGTGATGATGT          |           |                                                           |
| pmtA-in-F                   | GTCTTTTCTTGCTCACCCG                    | 755       | An internal region of pmtA                                |
| pmtA-in-R                   | TCAAAAACAGCGACTTTTCATT                 |           |                                                           |
| pmtA-out-F                  | CCAGAGATTTTCAATAAGGCA                  | 4199/2472 | A fragment containing pmtA                                |

|                       |                                       |           |                                   |
|-----------------------|---------------------------------------|-----------|-----------------------------------|
| <i>pmtA</i> -out-R    | CATAGGGATAGAAGGTCGCA                  |           |                                   |
| <i>perR</i> -LA-F     | GATGTTGTCCGCAATGTCAC                  | 1135      | Left arm of <i>perR</i>           |
| <i>perR</i> -Fir-LA-R | ATTCACGAACCATCTACGGCATTGTCTG          |           |                                   |
| <i>perR</i> -SCIY-F   | GCCGTAGATGGTTCGTGAATACATGTTATAATAACT  | 1803      | The SCIY cassette                 |
| <i>perR</i> -SCIY-R   | ATCTAAAAGAATGTAAAATATAACGCCCAATT      |           |                                   |
| <i>perR</i> -Fir-RA-F | TATATTTTACATTCTTTTAGATGTTGGATGACGT    | 1138      | Right arm of <i>perR</i>          |
| <i>perR</i> -RA-R     | GTCGGAATGACCTCAAAACC                  |           |                                   |
| <i>perR</i> -Sec-LA-R | ATCTAAAAGAACATCTACGGCATTGTCTG         |           |                                   |
| <i>perR</i> -Sec-RA-F | GCCGTAGATGTTCTTTTAGATGTTGGATGACGT     |           |                                   |
| <i>perR</i> -in-F     | TCAAGCTCGGGATTTCTACA                  | 241       | An internal region of <i>perR</i> |
| <i>perR</i> -in-R     | GATGACCACCCTAGTGCTGA                  |           |                                   |
| <i>perR</i> -out-F    | TCATCGCCAAGATAGGTCG                   | 2794/2444 | A fragment containing <i>perR</i> |
| <i>perR</i> -out-R    | AGAGGGAAGCAAGCCAATC                   |           |                                   |
| <i>lysR</i> -LA-F     | ATACCTGCTGGTGTCTCGG                   | 1250      | Left arm of <i>lysR</i>           |
| <i>lysR</i> -Fir-LA-R | ATTCACGAACACTGCCTGTTTCTGCAATTT        |           |                                   |
| <i>lysR</i> -SCIY-F   | AACAGGCAGTGTTTCGTGAATACATGTTATAATAACT | 1803      | The SCIY cassette                 |
| <i>lysR</i> -SCIY-R   | GCCTTTTCGTTGTAAAATATAACGCCCAATT       |           |                                   |
| <i>lysR</i> -Fir-RA-F | TATATTTTACAACGAAAAGGCATTGCTGTC        | 1264      | Right arm of <i>lysR</i>          |
| <i>lysR</i> -RA-R     | CAACACCTTCGCCGATAAT                   |           |                                   |
| <i>lysR</i> -Sec-LA-R | GCCTTTTCGTA CTGCCTGTTTCTGCAATTT       |           |                                   |
| <i>lysR</i> -Sec-RA-F | AACAGGCAGTACGAAAAGGCATTGCTGTC         |           |                                   |
| <i>lysR</i> -in-F     | CGCCAACTATTTAGCGTCTC                  | 329       | An internal region of <i>lysR</i> |
| <i>lysR</i> -in-R     | GGGAAATCTACCAAATCATCG                 |           |                                   |
| <i>lysR</i> -out-F    | TTCGGATAAGACCGCCTC                    | 3460/2679 | A fragment containing <i>lysR</i> |
| <i>lysR</i> -out-R    | CCTTTCTTACTTGGTACATTCT                |           |                                   |

<sup>1</sup> The bold sequences are restriction sites.

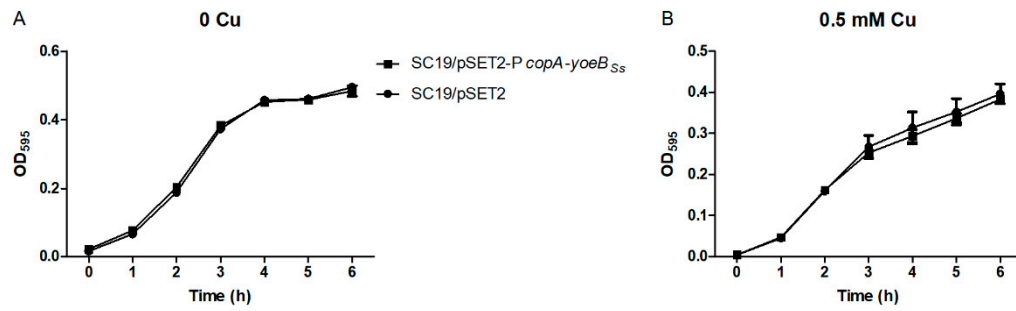

**Figure S1.** YoeB<sub>ss</sub> expression had no significant effect on *S. suis* growth in liquid media. The SC19/pSET2-P*copA-yoeB<sub>ss</sub>* and SC19/pSET2 strains were grown in the absence (A) and presence of 0.5 mM CuSO<sub>4</sub> (B). At least three independent experiments were performed; the data shown are the means  $\pm$  SDs from three wells in a representative experiment.

**Text S1.** DNA sequence of the SCIY cassette (5'-3').

“GTTCTGTAATACATGTTATAATAACTATAACTAATAACGTAACGTGACTGGCAAGAG  
ATATTTTTAAAACAATGAATAGGTTTACACTTACTTTAGTTTTATGGAAATGAAAGAT  
CATATCATATATAATCTAGAATAAAATTAATAAAATAATTATTATCTAGATAAAAA  
ATTTAGAAGCCAATGAAATCTATAAATAAACTAAATTAAGTTTATTTAATTAACAAC  
ATGGATATAAAATAGGTACTAATCAAAATAGTGAGGAGGATATATTTGAATACATAC  
GAACAAATTAATAAAGTGAAAAAAATACTTCGGAAACATTTAAAAAATAACCTTATT  
GGTACTTACATGTTTGGATCAGGAGTTGAGAGTGGACTAAAACCAAATAGTGATCTT  
GACTTTTTAGTCGTCGTATCTGAACCATTGACAGATCAAAGTAAAGAAATACTTATAC  
AAAAAATTAGACCTATTTCAAAAAAAATAGGAGATAAAAGCAACTTACGATATATTG  
AATTAACAATTATTATTCAGCAAGAAATGGTACCGTGGAATCATCCTCCCAAACAAG  
AATTTATTTATGGAGAATGGTTACAAGAGCTTTATGAACAAGGATACATTCCTCAGAA  
GGAATTAAATTCAGATTTAACCATAATGCTTTACCAAGCAAAACGAAAAAATAAAA  
GAATATACGGAAATTATGACTTAGAGGAATTACTACCTGATATTCCATTTTCTGATGT  
GAGAAGAGCCATTATGGATTCGTCAGAGGAATTAATAGATAATTATCAGGATGATGA  
AACCAACTCTATATTAACCTTTATGCCGTATGATTTTAACTATGGACACGGGTAAAATC  
ATACCAAAGATATTGCGGGAAATGCAGTGGCTGAATCTTCTCCATTAGAACATAGG  
GAGAGAATTTTGTTAGCAGTTCGTAGTTATCTTGGAGAGAATATTGAATGGACTAATG  
AAAATGTAAATTTAACTATAAACTATTTAAATAACAGATTAAAAAATTATAAAAAA  
ATTGAAAAAATGGTGGAAACACTTTTTTCAATTTTTTTGTTTTATTATTTAATATTTGGG  
AAATATTCATTCTAATTGGTAATCAGATTTTAGAAAACCTTTGGGGAACCTTTGGAGGT  
TGGAGATAGAGCGAACCTAGTTCGTATCGATATGATGTAGATAGAACACTGTTCCCTT  
TATATTTCAAGGGAACAGGCTGAAAACCTCCACAGGAGCTTTTCAGTCATCAAATCA  
AGTCAACAACGTCTGATTTTGATTTTCGAAGAGTATTAATCAAAAATGTTTACAAACG  
TAGTCGTATATTGTATAATTTGTTTACAGATGTAGTCGGAAAAGGAGTAACCTTTGAT  
GAGTAGTAGTCAACGTTTATTATCGTGGACTGATGATGCTTGGGATGACTACCTGTAT  
TGGCAAACCTCAAGACAAGAAAACACTCAAGCGCATCAATAAACTCATCAATGATGTT  
AAGCGCTCTCCATTTGAGGGCATTGGTAAACCAGAGCCGTTAAAAGAGAACTTATCT  
GGTTTTTGGTCTCGTCGTATTGATGATACTAATAGGCTTGTTTACGCAGTCGATGATCA  
AGCGATAACGATAATTTTCATGTCGTTACCACTACTAAATCAGGTTTCAGCGATCTGACA  
TCTAACAAACAATTTAAGAGTGATTCTCAACGCTTGGCATTTTTTCATTCCATCGTTGGG  
TTTTGTGTTTAAGGTGTAATGGTTTCGTTTCGTGGTAGCGTTGCTCACACCTTAATTGG  
CGTTATATTTTACA”
